# Supplementary material for: Use of near-infrared spectroscopy to assess phosphorus fractions of different plant availability in forest soils
Source: Copernicus journal article supplement (doi:10.5194/bg-12-3415-2015), 2015-06-05
Supplement: Supplementary file 1 [file bg-12-3415-2015-supplement.zip]

Table S1 Mean values, standard deviation and standard error for the total sum and the distinct Hedley P fractions of a 16 times repeatedly measured soil sample (in-house reference).

| <b>Hedley Fraction</b>                 | <b>N</b> | Mean<br>value<br>mg kg <sup>-1</sup> | Standard<br>deviation <sup>2</sup><br>mg kg <sup>-1</sup> | Standard<br>error<br>% |
|----------------------------------------|----------|--------------------------------------|-----------------------------------------------------------|------------------------|
| <b>Sum of all<br/>Hedley fractions</b> | 16       | 379.3                                | 16.8                                                      | 4.4                    |
| <b>Pi Resin</b>                        | 16       | 15.9                                 | 1.1                                                       | 6.7                    |
| <b>Pi NaHCO<sub>3</sub></b>            |          | 7.3                                  | 0.7                                                       | 9.9                    |
| <b>Po NaHCO<sub>3</sub></b>            |          | 35.6                                 | 3.2                                                       | 9.0                    |
| <b>Pi NaOH</b>                         |          | 15.6                                 | 0.7                                                       | 4.5                    |
| <b>Po NaOH</b>                         |          | 78.0                                 | 6.7                                                       | 8.5                    |
| <b>Pi 1M HCl</b>                       |          | 4.1                                  | 0.5                                                       | 11.1                   |
| <b>P HCl conc.</b>                     |          | 19.4                                 | 2.6                                                       | 13.2                   |
| <b>P Residual</b>                      |          | 203.4                                | 14.8                                                      | 7.3                    |
