# Supplementary material for: Use of near-infrared spectroscopy to assess phosphorus fractions of different plant availability in forest soils
Source: Copernicus journal article supplement (doi:10.5194/bg-12-3415-2015), 2015-06-05
Supplement: Supplementary file 2 [file bg-12-3415-2015-supplement.zip]

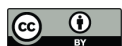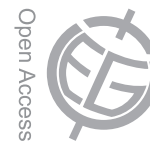

## *Supplement of*

# **Use of near-infrared spectroscopy to assess phosphorus fractions of different plant availability in forest soils**

**J. Niederberger et al.**

*Correspondence to:* J. Niederberger ([joerg.niederberger@waldbau.uni-freiburg.de](mailto:joerg.niederberger@waldbau.uni-freiburg.de))

- [bg-12-3415-2015-supplement-cover-letter.pdf](#)
- [Table S1.pdf](#)
- [Table S2.pdf](#)

The copyright of individual parts of the supplement might differ from the CC-BY 3.0 licence.
