# Supplementary material for: Use of near-infrared spectroscopy to assess phosphorus fractions of different plant availability in forest soils
Source: Copernicus journal article supplement (doi:10.5194/bg-12-3415-2015), 2015-06-05
Supplement: Supplementary file 3 [file bg-12-3415-2015-supplement.zip]

Table S2: Descriptive statistical parameters of soil P content (mg kg<sup>-1</sup>) as the total sum of Hedley P fractions, single P fractions and in pools of different plant availability, grouped by data sets used for NIRS modelling.

All **used** samples (**BEF+BZE**)

| <b>P-Pool</b>         | <b>n</b> | <b>Min</b> | <b>Max</b> | <b>Mean</b> | <b>Max</b> | <b>SD</b> | <b>Skewness</b> | <b>Kurtosis</b> |
|-----------------------|----------|------------|------------|-------------|------------|-----------|-----------------|-----------------|
| total P               |          | 26.0       | 2796.0     | 323.7       | 2796.0     | 371.8     | 2.4             | 8.6             |
| Pi Resin              | 576      | 0.1        | 237.3      | 20.7        | 237.3      | 28.7      | 3.1             | 12.6            |
| Pi NaHCO <sub>3</sub> |          | 0.0        | 359.6      | 14.9        | 359.6      | 30.5      | 5.4             | 43.1            |
| Po NaHCO <sub>3</sub> |          | 0.0        | 287.0      | 33.6        | 287.0      | 45.3      | 2.5             | 7.1             |
| Pi NaOH               |          | 1.3        | 689.2      | 48.3        | 689.2      | 81.3      | 3.7             | 18.7            |
| Po NaOH               |          | 3.6        | 667.8      | 94.7        | 667.8      | 106.7     | 2.2             | 5.3             |
| Pi 1M HCl             |          | 0.0        | 1506.0     | 25.1        | 1506.0     | 87.0      | 12.0            | 181.7           |
| P HCl conc.           |          | 2.6        | 650.3      | 58.9        | 650.3      | 84.6      | 2.9             | 10.7            |
| P Residual            |          | 0.6        | 228.0      | 27.6        | 228.0      | 26.9      | 2.9             | 11.7            |
| P labile              |          | 1.2        | 850.0      | 69.2        | 850.0      | 94.4      | 3.0             | 13.3            |
| P moderately labile   |          | 8.1        | 2307.7     | 168.1       | 2307.7     | 225.6     | 3.8             | 24.7            |
| P stable              |          | 6.7        | 805.2      | 86.5        | 805.2      | 105.3     | 2.7             | 9.0             |

All **BEF** samples

| <b>P-Pool</b>         | <b>n</b> | <b>Min</b> | <b>Max</b> | <b>Mean</b> | <b>Max</b> | <b>SD</b> | <b>Skewness</b> | <b>Kurtosis</b> |
|-----------------------|----------|------------|------------|-------------|------------|-----------|-----------------|-----------------|
| total P               |          | 26.0       | 332.0      | 95.8        | 48.4       | 1.7       | 4.5             | 26.0            |
| Pi Resin              | 294      | 0.1        | 32.6       | 6.1         | 4.1        | 2.5       | 10.6            | 0.1             |
| Pi NaHCO <sub>3</sub> |          | 0.0        | 7.8        | 2.0         | 1.3        | 1.1       | 2.0             | 0.0             |
| Po NaHCO <sub>3</sub> |          | 0.2        | 38.8       | 8.8         | 6.0        | 1.3       | 3.5             | 0.2             |
| Pi NaOH               |          | 2.2        | 23.4       | 7.9         | 4.2        | 1.6       | 2.9             | 2.2             |
| Po NaOH               |          | 7.4        | 141.8      | 36.4        | 19.1       | 1.7       | 6.1             | 7.4             |
| Pi 1M HCl             |          | 0.0        | 2.3        | 0.5         | 0.6        | 1.1       | 0.2             | 0.0             |
| P HCl conc.           |          | 2.6        | 153.2      | 20.2        | 20.4       | 3.6       | 16.0            | 2.6             |
| P Residual            |          | 3.7        | 34.7       | 14.0        | 5.5        | 0.5       | 0.4             | 3.7             |
| P labile              |          | 1.2        | 78.9       | 17.0        | 10.6       | 1.8       | 6.4             | 1.2             |
| P moderately labile   |          | 11.0       | 164.5      | 44.7        | 22.3       | 1.7       | 5.6             | 11.0            |
| P stable              |          | 10.8       | 174.8      | 34.1        | 23.1       | 3.0       | 11.8            | 10.8            |

All **BZE** samples

| <b>P-Pool</b>         | <b>n</b> | <b>Min</b> | <b>Max</b> | <b>Mean</b> | <b>Max</b> | <b>SD</b> | <b>Skewness</b> | <b>Kurtosis</b> |
|-----------------------|----------|------------|------------|-------------|------------|-----------|-----------------|-----------------|
| total P               |          | 58.0       | 2796.0     | 561.4       | 411.5      | 1.9       | 6.2             | 58.0            |
| Pi Resin              | 282      | 0.5        | 237.3      | 35.8        | 34.8       | 2.2       | 6.7             | 0.5             |
| Pi NaHCO <sub>3</sub> |          | 0.3        | 359.6      | 28.3        | 39.4       | 4.1       | 25.0            | 0.3             |
| Po NaHCO <sub>3</sub> |          | 0.0        | 287.0      | 59.5        | 53.3       | 1.7       | 3.0             | 0.0             |
| Pi NaOH               |          | 1.3        | 689.2      | 90.5        | 100.1      | 2.8       | 10.6            | 1.3             |
| Po NaOH               |          | 3.6        | 667.8      | 155.4       | 125.1      | 1.4       | 1.7             | 3.6             |
| Pi 1M HCl             |          | 0.3        | 1506.0     | 50.8        | 119.1      | 9.0       | 97.5            | 0.3             |
| P HCl conc.           |          | 3.7        | 650.3      | 99.4        | 104.8      | 2.0       | 4.8             | 3.7             |
| P Residual            |          | 0.6        | 228.0      | 41.9        | 32.4       | 2.1       | 6.4             | 0.6             |
| P labile              |          | 6.0        | 850.0      | 123.6       | 110.9      | 2.3       | 8.5             | 6.0             |
| P moderately labile   |          | 8.1        | 2307.7     | 296.7       | 266.7      | 3.2       | 18.5            | 8.1             |
| P stable              |          | 6.7        | 805.2      | 141.1       | 127.6      | 1.9       | 4.1             | 6.7             |

**BZE Brow Earth** samples

| <b>P-Pool</b>         | <b>n</b> | <b>Min</b> | <b>Max</b> | <b>Mean</b> | <b>Max</b> | <b>SD</b> | <b>Skewness</b> | <b>Kurtosis</b> |
|-----------------------|----------|------------|------------|-------------|------------|-----------|-----------------|-----------------|
| total P               |          | 128.0      | 2178.0     | 647.6       | 433.6      | 1.3       | 2.1             | 128.0           |
| Pi Resin              | 84       | 3.3        | 237.3      | 43.1        | 44.3       | 2.3       | 6.0             | 3.3             |
| Pi NaHCO <sub>3</sub> |          | 2.3        | 359.6      | 41.9        | 52.5       | 3.5       | 16.7            | 2.3             |
| Po NaHCO <sub>3</sub> |          | 5.4        | 287.0      | 80.0        | 68.6       | 1.1       | 0.5             | 5.4             |
| Pi NaOH               |          | 5.2        | 689.2      | 111.7       | 118.1      | 2.6       | 8.5             | 5.2             |
| Po NaOH               |          | 14.2       | 536.3      | 196.6       | 141.0      | 0.7       | -0.5            | 14.2            |
| Pi 1M HCl             |          | 2.5        | 253.1      | 42.0        | 42.7       | 2.5       | 8.7             | 2.5             |
| P HCl conc.           |          | 5.2        | 468.0      | 98.3        | 100.6      | 1.6       | 2.6             | 5.2             |
| P Residual            |          | 2.4        | 106.8      | 34.3        | 22.5       | 0.6       | 0.2             | 2.4             |
| P labile              |          | 10.9       | 850.0      | 165.0       | 147.3      | 2.1       | 5.6             | 10.9            |
| P moderately labile   |          | 46.9       | 1227.0     | 350.3       | 250.7      | 1.2       | 1.8             | 46.9            |
| P stable              |          | 6.7        | 534.3      | 132.2       | 117.5      | 1.5       | 2.1             | 6.7             |
